# Supplementary material
Source: Copernicus journal article supplement (doi:10.5194/egusphere-2026-1134)
Supplement: Supplementary file [file egusphere-2026-1134-AC2-supplement.pdf]

**Author comments on the manuscript “TANGO CO<sub>2</sub> and NO<sub>2</sub> Observations: Synergistic Usage to Improve Emission Quantification and Characterize Atmospheric Chemistry”, Reviewer 2**

We thank the reviewer for the positive and supportive assessment of the manuscript. We appreciate the recommendation for publication, either in its current form or after addressing the comments raised by the other referee. We have carefully considered and addressed all comments provided during the review process.
